# Supplementary material for: The positive effect on hole transport behaviour in anisotropic gels consisting of discotic liquid crystals and hydrogen-bonded fibresElectronic supplementary information (ESI) available: transient photocurrents for 1, 1/2 and 1/3. See http://www.rsc.org/suppdata/cc/b1/b111380c/
Source: Royal Society of Chemistry journal article supplement (doi:10.1039/b111380c), 2002-02-07
Supplement: b111380c.doc [file b111380c.doc]

Supplementary data

The positive effect on hole transport behaviour in anisotropic gels consisting of discotic liquid crystals and hydrogen-bonded fibres

Norihiro Mizoshita, Hirosato Monobe, Masaaki Inoue, Masakatsu Ukon, Tsuyoshi Watanabe, Yo Shimizu, Kenji Hanabusa and Takashi Kato*

For the hole mobility measurements, the transit time of the hole was determined as a kink point in the double logarithmic plot of the transient photocurrent as a function of time. Fig. S1 shows the typical transient photocurrents for the discotic liquid-crystalline materials used in the present study. Each transient photocurrent exhibits a clear plateau indicating the non-dispersive nature of the hole transport.

**Fig. S1** Typical transient photocurrents for **1** (a), **1**/**2** (b), and **1**/**3** (c) in an electric field of 4.0  104 V cm–1 at 75 ˚C. The cell thickness is 32.8 µm in (a), 33.4 µm in (b) and 15.7 µm in (c), respectively.
